# Supplementary material
Source: MDPI journal article supplement (https://www.mdpi.com/2673-6284/12/3/50)
Supplement: s1 [file s1]

## Supplementary Materials

(A)

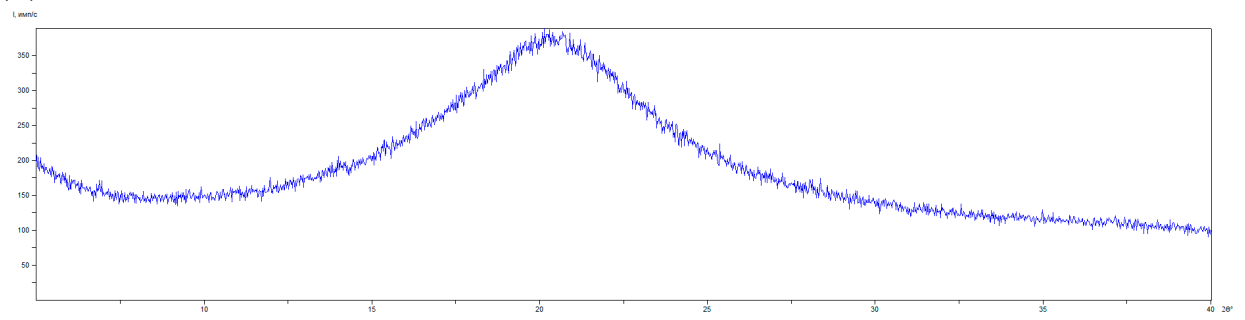

(B)

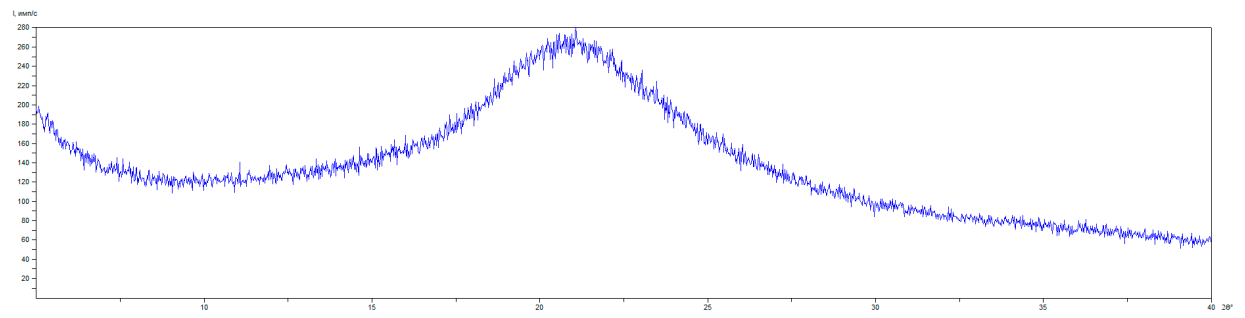

(C)

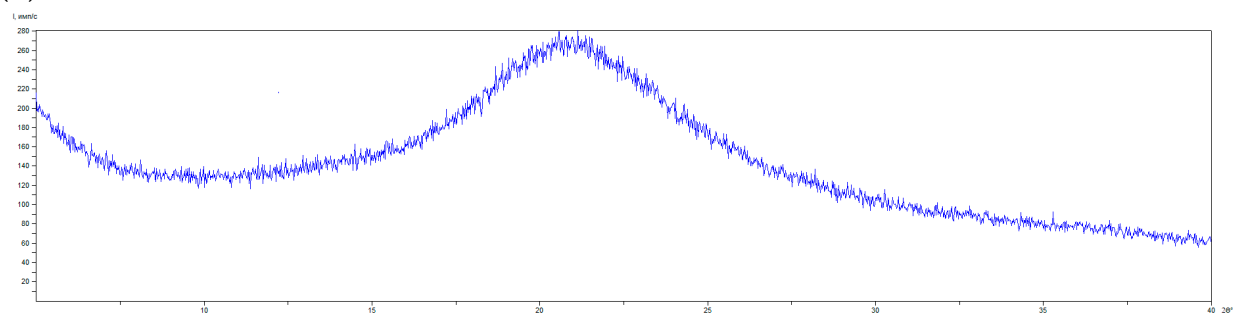

(D)

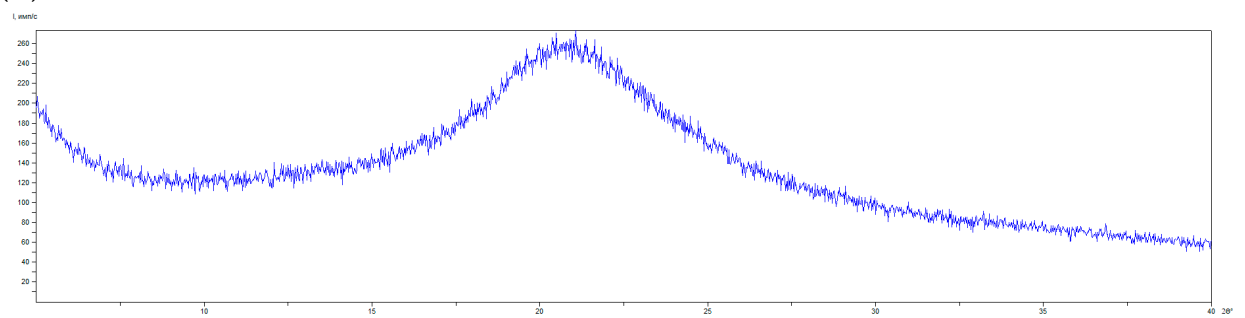

(E)

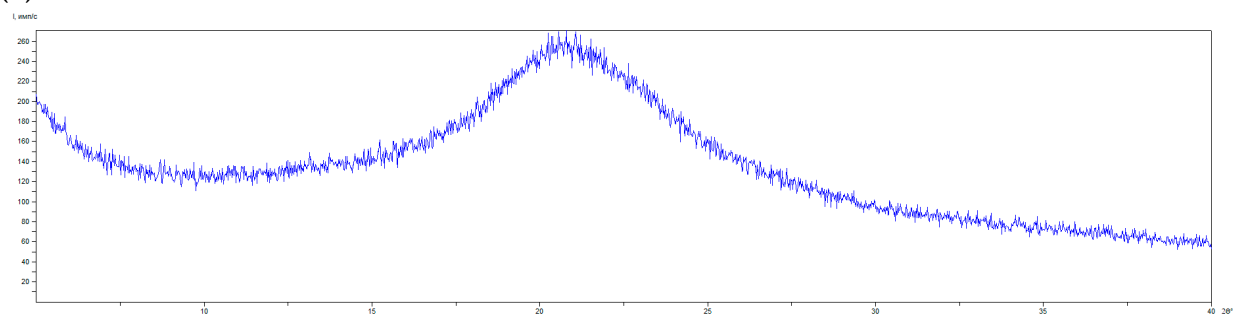

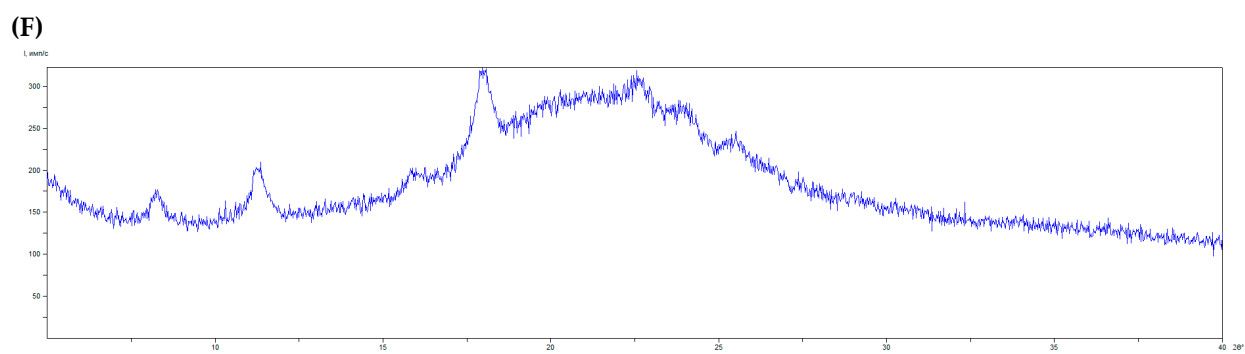

**Figure S1.** The X-ray diffraction patterns of films **O** (A); **A2** (B); **B5** (C); **C10** (D); **D15** (E) and **Q** (F).
